# Supplementary material for: Zn–Al and Mg–Al layered double hydroxide nanoparticles improved primary and secondary metabolism of geranium plants
Source: Royal Society of Chemistry journal article supplement (doi:10.1039/d4ra04280h), 2024-01-01
Supplement: d4ra04280h1.pdf [file d4ra04280h1.pdf]

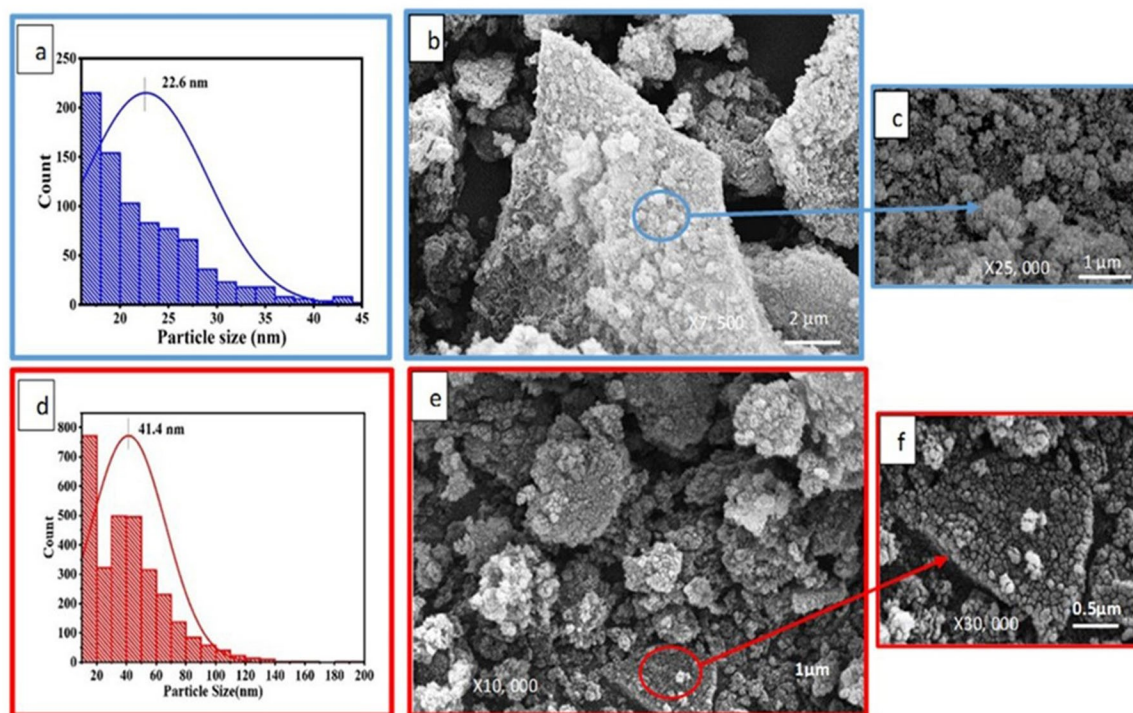

**Fig. S1** SEM image of synthesized Zn-Al LDH NPs and Mg-Al LDH NPs (a) Particle size at different average diameters of Zn-Al LDH NPs. (b) SEM shows the layer's shape on their surface aggregate of particles of Zn-Al LDH NPs. (c) SEM shows the aggregate nanoparticle on the layer's surface of Zn-Al LDH NPs. (d) the particle size at different average diameters of Mg-Al LDH NPs. (e) SEM shows nanoparticles appeared as aggregates resembling nearly spherical shapes of Mg-Al LDH NPs. (f) SEM shows the magnified aggregate nanoparticle of Mg-Al LDH NPs.

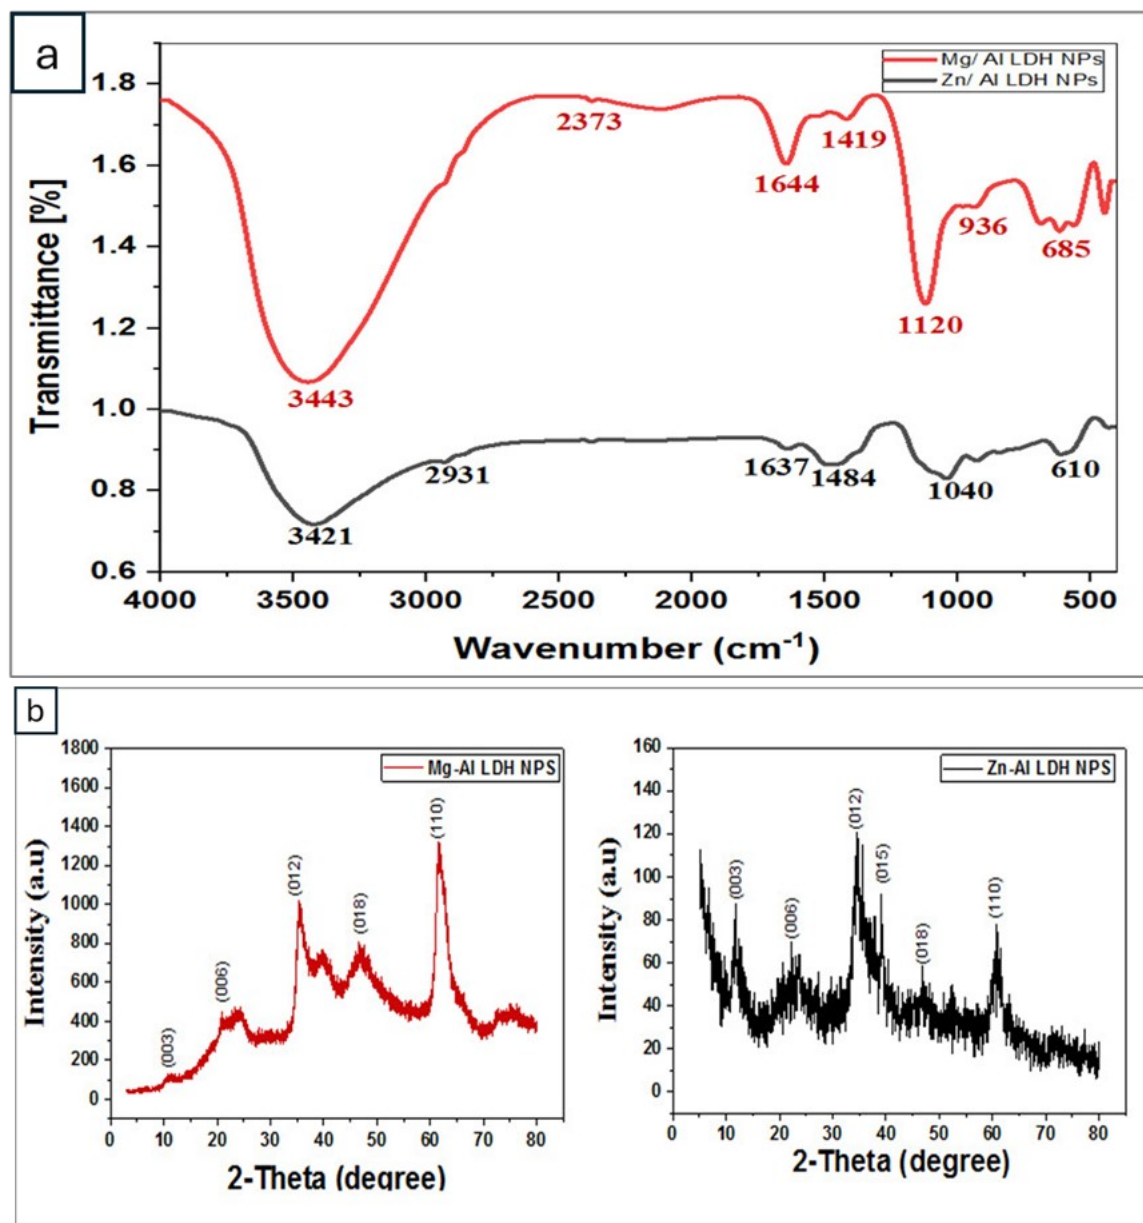

**Fig. S2** (a) FTIR chart of Zn-AL LDH NPs and Mg-AL LDH NPs and (b) XRD chart of Zn-AL LDH NPs and Mg-AL LDH NPs.

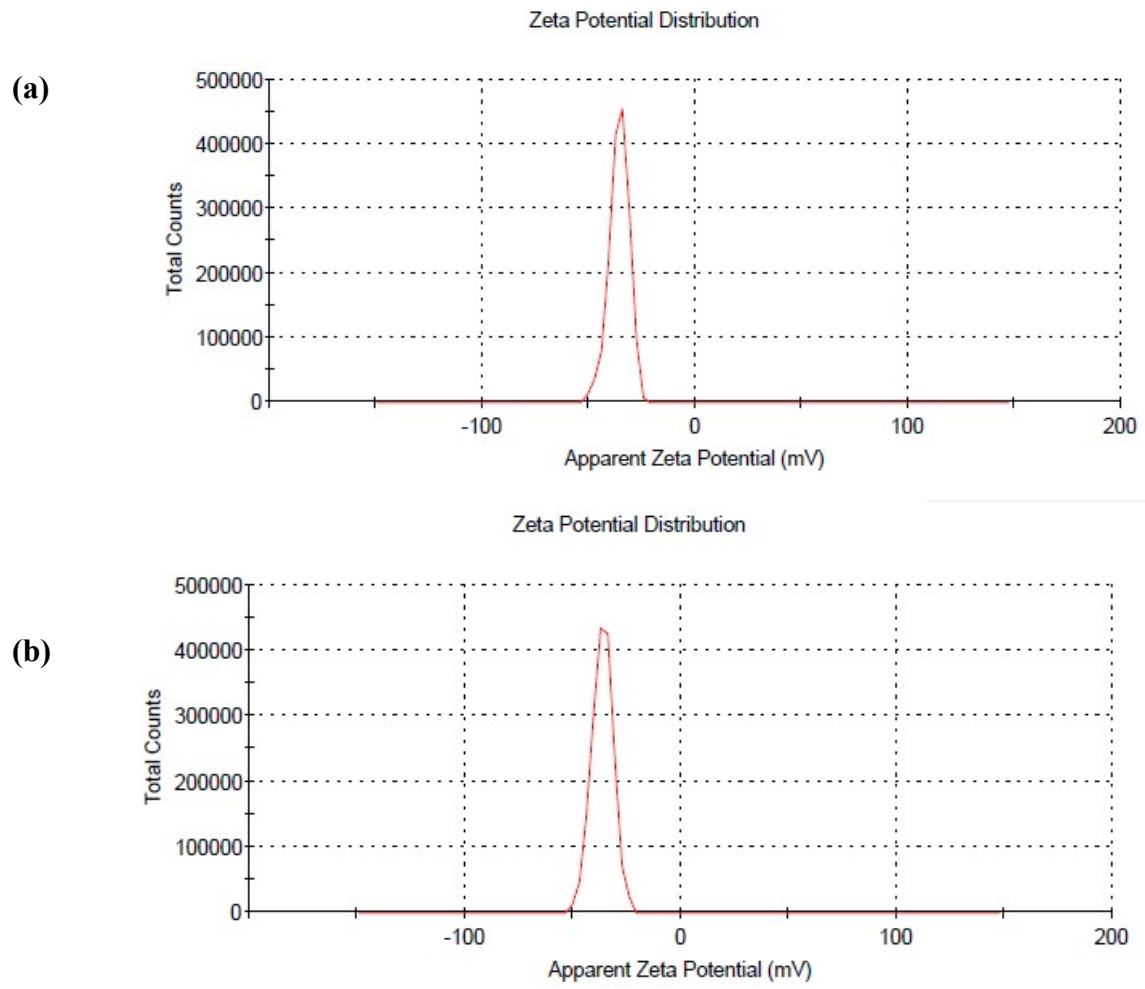

**Fig. S3** Zeta potential of (a) Zn-Al LDH NPs and (b) Mg-Al LDH NPs

(a)

|                                | Size (d.nm):         | % Intensity: | St Dev (d.n...) |
|--------------------------------|----------------------|--------------|-----------------|
| <b>Z-Average (d.nm):</b> 892.7 | <b>Peak 1:</b> 965.6 | 100.0        | 138.6           |
| <b>Pdl:</b> 0.102              | <b>Peak 2:</b> 0.000 | 0.0          | 0.000           |
| <b>Intercept:</b> 0.919        | <b>Peak 3:</b> 0.000 | 0.0          | 0.000           |

**Result quality :** Refer to quality report

---

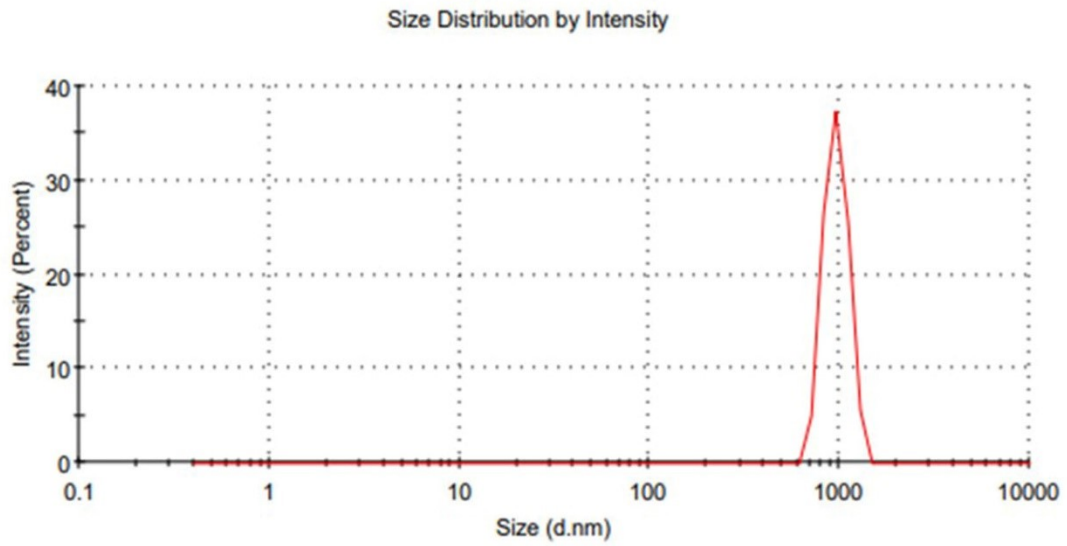

(b)

|                               | Size (d.nm):         | % Intensity: | St Dev (d.n...) |
|-------------------------------|----------------------|--------------|-----------------|
| <b>Z-Average (d.nm): 2903</b> | <b>Peak 1:</b> 1175  | 100.0        | 145.2           |
| <b>Pdl: 0.602</b>             | <b>Peak 2:</b> 0.000 | 0.0          | 0.000           |
| <b>Intercept: 1.06</b>        | <b>Peak 3:</b> 0.000 | 0.0          | 0.000           |

**Result quality : Refer to quality report**

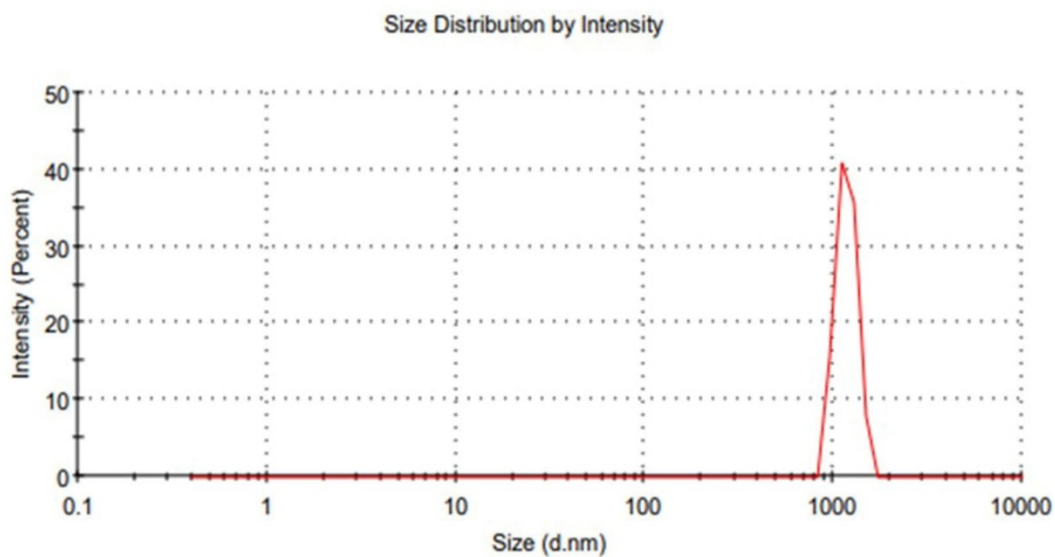

**Fig. S4** Size distribution of (a) Zn-Al LDH NPs and (b) Mg-Al LDHNPs.

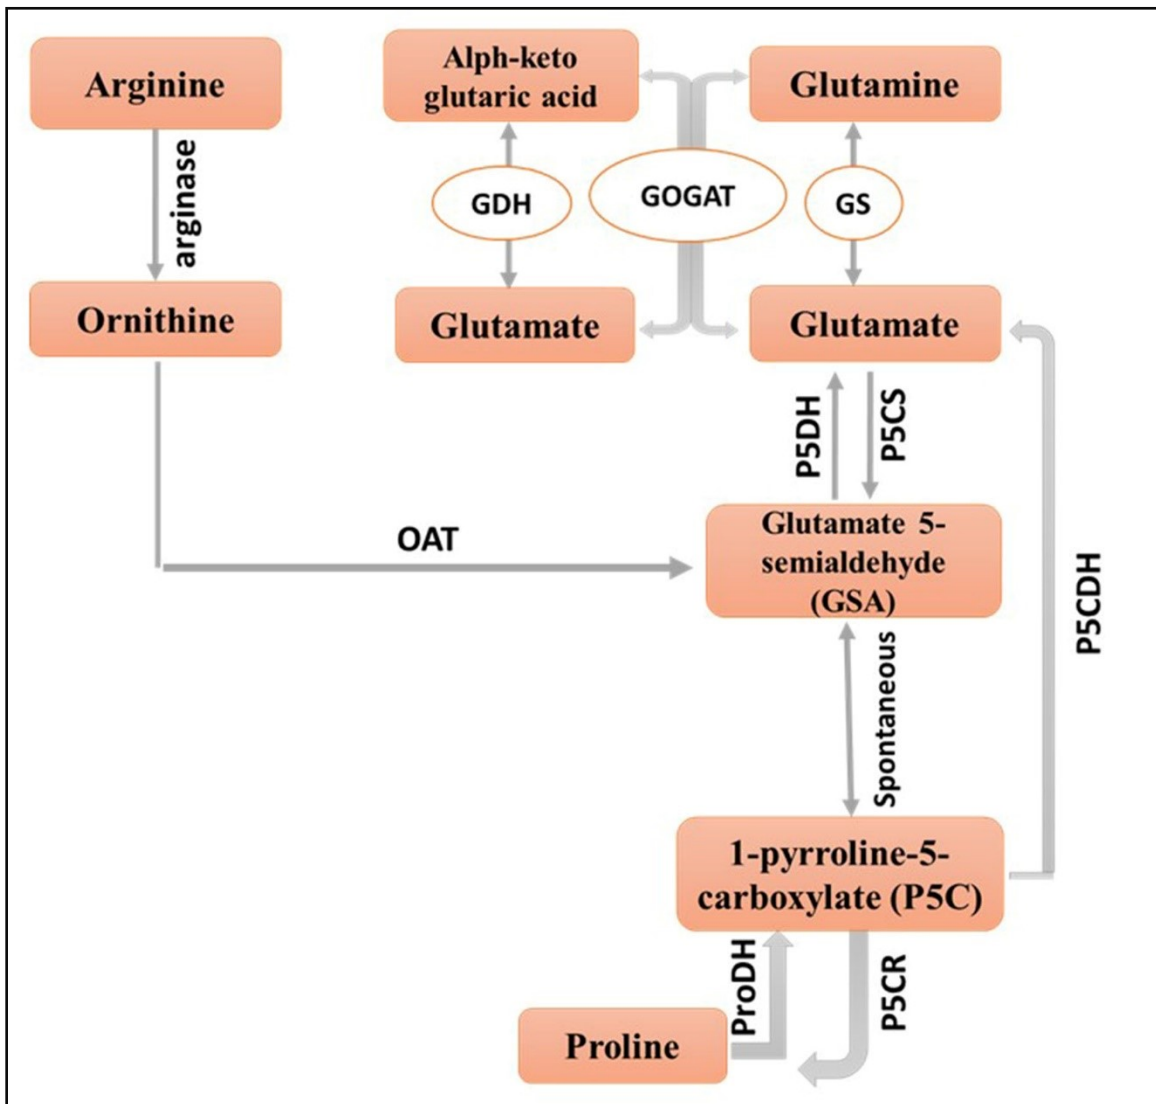

Fig. S5 The proline metabolic pathway

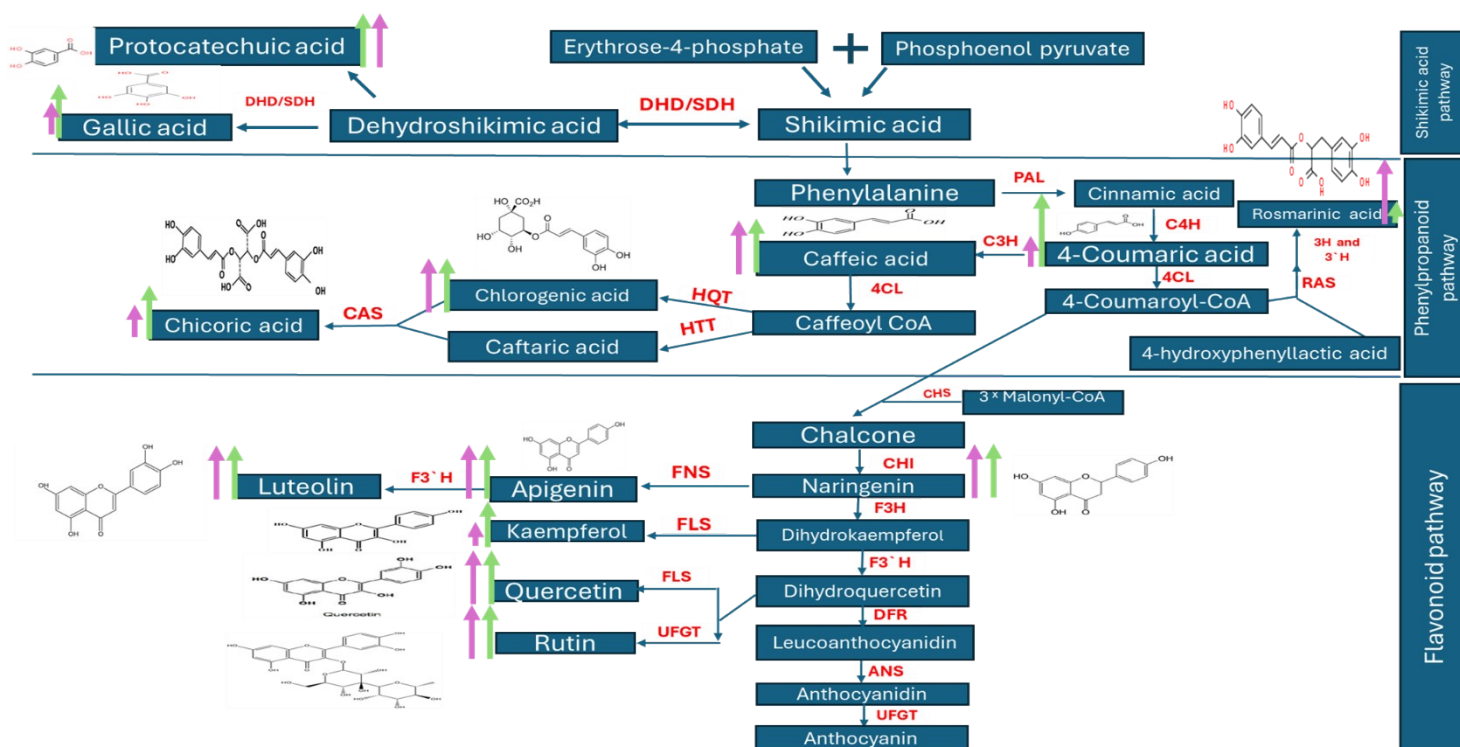

**Fig. S6** Biosynthesis pathway of phenolic compounds in geranium plant. Notes: Enzymes: DHD, 3-dehydroquinatase; SDH, shikimate dehydrogenase; PAL, phenylalanine ammonia lyase; C4H, cinnamate 4-hydroxylase; 4CL, 4-coumaroyl-CoA ligase; C3H, p-coumarate-3-hydroxylase; HTT, hydroxycinnamoyl-CoA: tartaric acid hydroxycinnamoyl transferase; HQT, hydroxycinnamoyl-CoA: quinate hydroxycinnamoyl transferase; CAS, chicoric acid synthase; 3H and 3'H, hydroxycinnamoyl-hydroxyphenyllactate 3- and 3'-hydroxylases; RAS: rosmarinic acid synthase; CHS, chalcone synthase; CHI, chalcone isomerase; F3H, flavanone 3-hydroxylase; F3'H, flavonoid 3'-hydroxylase; DFR, dihydroflavonol 4-reductase; ANS, anthocyanidin synthase; FNS, flavonol synthase; FLS, flavonol synthase; UFGT, flavonoid-3-O-glycosyltransferase.

 : Refers to Mg-Al LDH NPs and  : Refers to Zn-Al LDH NPs.
